# Supplementary material for: Plasma proteome fingerprint in kidney diseases
Source: Frontiers journal article supplement (doi:10.3389/fmolb.2024.1494779), 2025-01-17
Supplement: Data_Sheet_2.pdf [file Data_Sheet_2.pdf]

| UniProt ID      | Gene     | Protein name                        | *Disease                                                                                                                                          | **ICD-10                                           | Name                                                                                                                                                                                                                                                    | * <a href="https://diseases.jensenlab.org/Search">https://diseases.jensenlab.org/Search</a><br>**ICD-10 Version:2019 |
|-----------------|----------|-------------------------------------|---------------------------------------------------------------------------------------------------------------------------------------------------|----------------------------------------------------|---------------------------------------------------------------------------------------------------------------------------------------------------------------------------------------------------------------------------------------------------------|----------------------------------------------------------------------------------------------------------------------|
| P00751          | CFB      | Complement factor B                 | Atypical hemolytic-uremic syndrome<br>Kidney disease<br>Thrombocytopenia<br>Hypertension<br>C3 glomerulopathy<br>Age-related macular degeneration | D59.3<br>N28.9<br>D69.6<br>I10-I15<br>N03.5<br>H35 | Haemolytic-uraemic syndrome<br>Disorder of kidney and ureter, unspecified<br>Thrombocytopenia, unspecified<br>Hypertensive diseases<br>Glomerulonephritis mesangiocapillary diffusa<br>Other retinal disorders                                          |                                                                                                                      |
| P01024          | C3       | Complement C3                       | Atypical hemolytic-uremic syndrome<br>Kidney disease<br>Complement component 3 deficiency                                                         | D59.3<br>N28.9                                     | Haemolytic-uraemic syndrome<br>Disorder of kidney and ureter, unspecified                                                                                                                                                                               |                                                                                                                      |
| P0C0L5          | C4B      | Complement C4-B                     | Atypical hemolytic-uremic syndrome<br>Kidney disease<br>Complement component 3 deficiency                                                         | D59.3<br>N28.9                                     | Haemolytic-uraemic syndrome<br>Disorder of kidney and ureter, unspecified                                                                                                                                                                               |                                                                                                                      |
| P0C0L4          | C4A      | Complement C4-A                     | Atypical hemolytic-uremic syndrome<br>Kidney disease<br>Complement component 3 deficiency                                                         | D59.3<br>N28.9                                     | Haemolytic-uraemic syndrome<br>Disorder of kidney and ureter, unspecified                                                                                                                                                                               |                                                                                                                      |
| P01023          | A2M      | Alpha-2-macroglobulin               | Cancer<br>Kidney disease<br>Thrombosis                                                                                                            | C00-C97<br>N28.9<br>N28.0                          | Malignant neoplasms<br>Disorder of kidney and ureter, unspecified<br>Ischaemia and infarction of kidney                                                                                                                                                 |                                                                                                                      |
| P00751          | CFB      | Complement factor B                 | Kidney disease<br>Hypertension<br>Anemia                                                                                                          | N28.9<br>I10-I15<br>D50-D89                        | Disorder of kidney and ureter, unspecified<br>Hypertensive diseases<br>Diseases of the blood and blood-forming organs and certain disorders involving the immune mechanism                                                                              |                                                                                                                      |
| P04004          | VTN      | Vitronectin                         | Atypical hemolytic-uremic syndrome<br>Cancer<br>Hematopoietic system disease<br>Thrombosis                                                        | D59.3<br>C00-C97<br>I82.9                          | Haemolytic-uraemic syndrome<br>Malignant neoplasms<br>Acute embolism and thrombosis                                                                                                                                                                     |                                                                                                                      |
| P02671          | FGA      | Fibrinogen alpha chain              | Anemia<br>Cancer<br>Malaria                                                                                                                       | D50-D89<br>C00-C97<br>B54                          | Diseases of the blood and blood-forming organs and certain disorders involving the immune mechanism<br>Malignant neoplasms<br>Unspecified malaria                                                                                                       |                                                                                                                      |
| P02675          | FGB      | Fibrinogen beta chain               | Thrombosis<br>Hypertension<br>Cancer                                                                                                              | I82<br>I10-I15<br>C00-C97                          | Other venous embolism and thrombosis<br>Hypertensive diseases<br>Malignant neoplasms                                                                                                                                                                    |                                                                                                                      |
| P02679          | FGG      | Fibrinogen gamma chain              | Thrombosis<br>Cancer                                                                                                                              | I82<br>C00-C97                                     | Other venous embolism and thrombosis<br>Malignant neoplasms                                                                                                                                                                                             |                                                                                                                      |
| P68871          | HBB      | Hemoglobin subunit beta             | Anemia<br>Cancer                                                                                                                                  | D50-D89<br>C00-C97                                 | Diseases of the blood and blood-forming organs and certain disorders involving the immune mechanism<br>Malignant neoplasms                                                                                                                              |                                                                                                                      |
| P00734          | F2       | Prothrombin                         | Thrombosis<br>Hypertension                                                                                                                        | I82<br>I10-I15                                     | Other venous embolism and thrombosis<br>Hypertensive diseases                                                                                                                                                                                           |                                                                                                                      |
| P05155          | SERPIN1  | Plasma protease C1 inhibitor        | C1 inhibitor deficiency<br>Kidney disease<br>Thrombosis<br>Hereditary angioedema<br>Neonatal lung disease                                         | D84.1<br>N28.9<br>I82<br>D80-D89<br>P19-P29        | Defects in the complement system<br>Disorder of kidney and ureter, unspecified<br>Other venous embolism and thrombosis<br>Certain disorders involving the immune mechanism<br>Respiratory and cardiovascular disorders specific to the perinatal period |                                                                                                                      |
| P01011          | SERPINA3 | Alpha-1-antichymotrypsin            | Cancer<br>Prostate disease<br>Alpha 1-antitrypsin deficiency<br>Malignant tumor of breast                                                         | C00-C97<br>N51.0<br>E88.0<br>C50                   | Malignant neoplasms<br>Disorders of prostate in diseases classified elsewhere<br>Disorders of plasma-protein metabolism, not elsewhere classified<br>Malignant neoplasms of breast                                                                      |                                                                                                                      |
| P19652          | ORM2     | Alpha-1-acid glycoprotein 2         | Cancer<br>Kidney disease<br>Male infertility with asthenoteratozoospermia<br>Ciliary dyskinesia                                                   | C00-C97<br>N28.9<br>N46<br>Q34                     | Malignant neoplasms<br>Disorder of kidney and ureter, unspecified<br>Male infertility<br>Other congenital malformations of respiratory system                                                                                                           |                                                                                                                      |
| P00738          | HP       | Haptoglobin                         | Anemia<br>Cancer<br>Kidney disease                                                                                                                | D50-D89<br>C00-C97<br>N28.9                        | Diseases of the blood and blood-forming organs and certain disorders involving the immune mechanism<br>Malignant neoplasms<br>Disorder of kidney and ureter, unspecified                                                                                |                                                                                                                      |
| P00450          | CP       | Ceruloplasmin                       | Aceruloplasminemia<br>Hemochromatosis<br>Cirrhosis, Hepatic<br>Parkinson Disease                                                                  | E.83.1<br>K70-K77<br>G20                           | Disorders of iron metabolism<br>Diseases of liver<br>Parkinson's Disease                                                                                                                                                                                |                                                                                                                      |
| P02765          | AHSG     | Alpha-2-HS-glycoprotein             | Chronic kidney disease<br>Type 2 diabetes mellitus<br>Obesity                                                                                     | N18<br>E11<br>E36-E68                              | Chronic kidney disease<br>Type 2 diabetes mellitus<br>Obesity and other hyperalimentation                                                                                                                                                               |                                                                                                                      |
| P19823          | ITIH2    | Inter-alpha-trypsin inhibitor heavy | Cancer<br>Autoimmune disease                                                                                                                      | C00-C97                                            | Malignant neoplasms                                                                                                                                                                                                                                     |                                                                                                                      |
| Q14624          | ITIH4    | Inter-alpha-trypsin inhibitor heavy | Cancer                                                                                                                                            | C00-C97                                            | Malignant neoplasms                                                                                                                                                                                                                                     |                                                                                                                      |
| P27169          | PON1     | Serum paraoxonase/arylesterase 1    | Lipid metabolism disorder<br>Kidney disease                                                                                                       | E78.9<br>N28.9                                     | Disorder of lipoprotein metabolism, unspecified<br>Disorder of kidney and ureter, unspecified                                                                                                                                                           |                                                                                                                      |
| P02787          | TF       | Serotransferrin                     | Cancer<br>Diabetes mellitus                                                                                                                       | C00-C97<br>E10-E14                                 | Malignant neoplasms<br>Diabetes mellitus                                                                                                                                                                                                                |                                                                                                                      |
| P02790          | HPX      | Hemopexin                           | Cancer<br>Kidney disease                                                                                                                          | C00-C97<br>N28.9                                   | Malignant neoplasms<br>Disorder of kidney and ureter, unspecified                                                                                                                                                                                       |                                                                                                                      |
| P04196          | HRG      | Histidine-rich glycoprotein         | Cancer                                                                                                                                            | C00-C97                                            | Malignant neoplasms                                                                                                                                                                                                                                     |                                                                                                                      |
| P01825          | IGHV4-59 | Ig                                  | Cancer<br>Celiac Disease<br>Type 2 diabetes                                                                                                       | C00-C97<br>K90<br>E11                              | Malignant neoplasms<br>Intestinal malabsorption<br>Type 2 diabetes mellitus                                                                                                                                                                             |                                                                                                                      |
| Serotransferrin |          | TF                                  | Cancer                                                                                                                                            | C00-C97                                            | Malignant neoplasms                                                                                                                                                                                                                                     |                                                                                                                      |
