# Supplementary material for: Plasma proteome fingerprint in kidney diseases
Source: Front Mol Biosci. 2025 Jan 17;11:1494779. doi: 10.3389/fmolb.2024.1494779 (PMC11782039; doi:10.3389/fmolb.2024.1494779)
Supplement: Supplementary file 2 [file Table2.xlsx]

## Sheet: Sheet1
accession	name	weight
P02790	Hemopexin	-0,306207519127767
P19652	Alpha-1-acid glycoprotein 2	-0,216708818416683
P02787	Serotransferrin	-0,20702071195607
Q14624	Inter-alpha-trypsin inhibitor heavy chain H4	-0,199396659710346
P01023	Alpha-2-macroglobulin	-0,191493348683202
P01011	Alpha-1-antichymotrypsin	-0,181964557947694
P00450	Ceruloplasmin	-0,174989224657761
P68871	Hemoglobin subunit beta	-0,17211489352578
P0DOY3	Immunoglobulin lambda constant 3	-0,162069956284319
P10909	Clusterin	-0,151242137252722
B9A064	Immunoglobulin lambda-like polypeptide 5	-0,145228265745216
P00751	Complement factor B	-0,14376636477354
P04004	Vitronectin	-0,1356510766494
P01877	Immunoglobulin heavy constant alpha 2	-0,12910387204848
P0C0L4	Complement C4-A	0,128805325962395
A0A0B4J1V1	Immunoglobulin heavy variable 3-21	-0,123700688798788
P02765	Alpha-2-HS-glycoprotein	-0,121941181813104
P02749	Beta-2-glycoprotein 1	-0,118124903439135
P02671	Fibrinogen alpha chain	0,117981330386449
P01763	Immunoglobulin heavy variable 3-48	-0,114408235258399
A2NJV5	Immunoglobulin kappa variable 2-29	0,111978221719511
P19823	Inter-alpha-trypsin inhibitor heavy chain H2	-0,11163840861471
A0A0C4DH25	Immunoglobulin kappa variable 3D-20	0,109732303786292
P01024	Complement C3	-0,109253496996537
P01876	Immunoglobulin heavy constant alpha 1	-0,108814627426992
P00738	Haptoglobin	-0,108809546111297
P01871	Immunoglobulin heavy constant mu	0,107938203959551
P02675	Fibrinogen beta chain	0,107447945463327
P01860	Immunoglobulin heavy constant gamma 3	-0,106130492317381
P01767	Immunoglobulin heavy variable 3-53	-0,106070619298546
P0CG04	Immunoglobulin lambda constant 1	-0,105781982829998
P0DP03	Immunoglobulin heavy variable 3-30-5	0,10403910503115
P01834	Immunoglobulin kappa constant	0,103728134775779
P27169	Serum paraoxonase/arylesterase 1	-0,103615465112928
P01772	Immunoglobulin heavy variable 3-33	-0,102747793653515
P02655	Apolipoprotein C-II	-0,10192178255885
P02679	Fibrinogen gamma chain	0,101872482683071
P01861	Immunoglobulin heavy constant gamma 4	-0,1016127794207
P05155	Plasma protease C1 inhibitor	-0,0996010350891908
A0A075B6S2	Immunoglobulin kappa variable 2D-29	0,0981667035592976
A0A0B4J1X5	Immunoglobulin heavy variable 3-74	-0,0954359956492963
P08603	Complement factor H	-0,0950874256024268
A0A0A0MRZ8	Immunoglobulin kappa variable 3D-11	-0,0945787551301223
P0DOY2	Immunoglobulin lambda constant 2	-0,094370348539931
P02654	Apolipoprotein C-I	0,093422166897193
P20742	Pregnancy zone protein	0,0907707866861635
A0A075B6K5	Immunoglobulin lambda variable 3-9	-0,0884523913004669
A0A075B6S6	Immunoglobulin kappa variable 2D-30	0,0836184444275383
P06310	Immunoglobulin kappa variable 2-30	0,0836184444275383
A0A0C4DH32	Immunoglobulin heavy variable 3-20	-0,0834333674259689
P01615	Immunoglobulin kappa variable 2D-28	0,0821125919189509
A0A075B6P5	Immunoglobulin kappa variable 2-28	0,0821125919189509
A0A087WW87	Immunoglobulin kappa variable 2-40	0,0776741862695899
P01614	Immunoglobulin kappa variable 2D-40	0,0761797575537799
A0A0B4J1X8	Immunoglobulin heavy variable 3-43	-0,0752647683180298
P01857	Immunoglobulin heavy constant gamma 1	-0,0751389266581009
P05090	Apolipoprotein D	0,0734900267657354
P02774	Vitamin D-binding protein	0,0715672299727144
P01825	Immunoglobulin heavy variable 4-59	-0,0697622168945203
P02763	Alpha-1-acid glycoprotein 1	-0,0684427436431797
P0DP02	Immunoglobulin heavy variable 3-30-3	-0,0618854729650378
A0A0A0MRZ7	Immunoglobulin kappa variable 2D-26	-0,0612808889871864
P00739	Haptoglobin-related protein	-0,0586500103595751
P0DP04	Immunoglobulin heavy variable 3-43D	-0,0585947924615833
P0C0L5	Complement C4-B	0,0584348900601714
A0A0C4DH55	Immunoglobulin kappa variable 3D-7	-0,0583803550003394
P69905	Hemoglobin subunit alpha	-0,0579233166147611
P01619	Immunoglobulin kappa variable 3-20	-0,0548889041326646
P04196	Histidine-rich glycoprotein	-0,052904600229185
P0DP08	Immunoglobulin heavy variable 4-38-2	0,0519720185976608
P01762	Immunoglobulin heavy variable 3-11	-0,0519565127425212
A0A0C4DH42	Immunoglobulin heavy variable 3-66	-0,0512943473613861
P06727	Apolipoprotein A-IV	-0,0504902493697177
P02768	Albumin	-0,0503588052812795
P01780	Immunoglobulin heavy variable 3-7	0,0483885010878825
P02656	Apolipoprotein C-III	-0,0461929508732022
P01859	Immunoglobulin heavy constant gamma 2	0,0445464972376731
P02647	Apolipoprotein A-I	0,0434101000378854
P0CF74	Immunoglobulin lambda constant 6	0,0422934133085224
P01768	Immunoglobulin heavy variable 3-30	-0,0412741005927097
P01764	Immunoglobulin heavy variable 3-23	-0,0402941715610463
P01824	Immunoglobulin heavy variable 4-39	-0,0392753709843707
P06331	Immunoglobulin heavy variable 4-34	-0,0392753709843707
A0A0C4DH41	Immunoglobulin heavy variable 4-61	-0,0392753709843707
P0DP06	Immunoglobulin heavy variable 4-30-4	-0,0392753709843707
P01700	Immunoglobulin lambda variable 1-47	-0,0350196371412956
P04217	Alpha-1B-glycoprotein	-0,0338289972004995
P04433	Immunoglobulin kappa variable 3-11	0,0318010438509145
P01766	Immunoglobulin heavy variable 3-13	-0,0314498768725366
P01008	Antithrombin-III	0,031346542454294
P35542	Serum amyloid A-4 protein	0,0294785500939464
A0A0J9YVY3	Immunoglobulin heavy variable 7-4-1	-0,0279246722267559
P80748	Immunoglobulin lambda variable 3-21	-0,019499130554075
P06312	Immunoglobulin kappa variable 4-1	-0,0157687857886475
P02753	Retinol-binding protein 4	-0,0142859290979599
P01009	Alpha-1-antitrypsin	0,0139090098200412
P01624	Immunoglobulin kappa variable 3-15	0,00822470245699109
P02042	Hemoglobin subunit delta	0,00733137966545888
P01782	Immunoglobulin heavy variable 3-9	-0,00709733726466444
P02649	Apolipoprotein E	0,00368725637888036
